# Supplementary material
Source: PubMed Central journal article supplement (PMC6899172)
Supplement: NIHMS1542833-supplement-1.pdf [file NIHMS1542833-supplement-1.pdf]

**Supplementary Information**

**Title:**

**Effects of gefitinib treatment on cellular uptake of extracellular vesicles in EGFR-mutant non-small cell lung cancer cells**

**Authors:**

Tomoya Takenaka<sup>a,b</sup>, Shinya Nakai<sup>a,b</sup>, Miku Katayama<sup>a,b</sup>, Mami Hirano<sup>a,b</sup>, Natsumi Ueno<sup>a,b</sup>, Kosuke Noguchi<sup>a,b</sup>, Tomoka Takatani-Nakase<sup>c</sup>, Ikuo Fujii<sup>b</sup>, Susumu S. Kobayashi<sup>d,e,\*</sup> and Ikuhiko Nakase<sup>a, b,\*</sup>

**Affiliations:**

<sup>a</sup>NanoSquare Research Institute, Research Center for the 21st Century, Organization for Research Promotion, Osaka Prefecture University, Sakai, Osaka 599-8570, Japan

<sup>b</sup>Graduate School of Science, Osaka Prefecture University, Sakai, Osaka 599-8570, Japan

<sup>c</sup>Department of Pharmaceutics, School of Pharmacy and Pharmaceutical Sciences, Mukogawa Women's University, Nishinomiya, Hyogo 663-8179, Japan

<sup>d</sup>Beth Israel Deaconess Medical Center, Harvard Medical School, Boston, MA 02215, U.S.A.

<sup>e</sup>Division of translational Genomics, Exploratory Oncology Research and Clinical Trial Center, National Cancer Center, Kashiwa, Chiba 277-8577, Japan

\*Correspondence and requests for materials should be addressed to S. S. K. (e-mail: sukobaya@east.ncc.go.jp) and to I. N. (e-mail: i-nakase@21c.osakafu-u.ac.jp)

*Supplementary Figures*

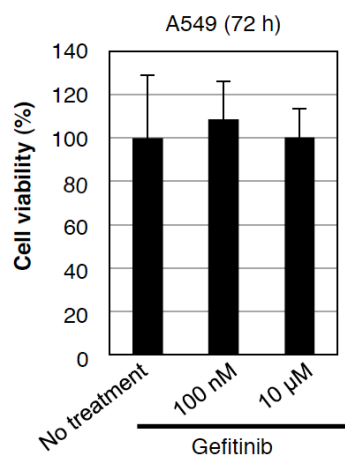

**Supplementary Figure S1.** Effects of gefitinib treatment on cell viability in A549 cells. Living cell counting assay of A549 cells treated with gefitinib (0 ~ 10  $\mu$ M) for 72 h at 37 °C. The data are the averages ( $\pm$  SD) of four experiments.

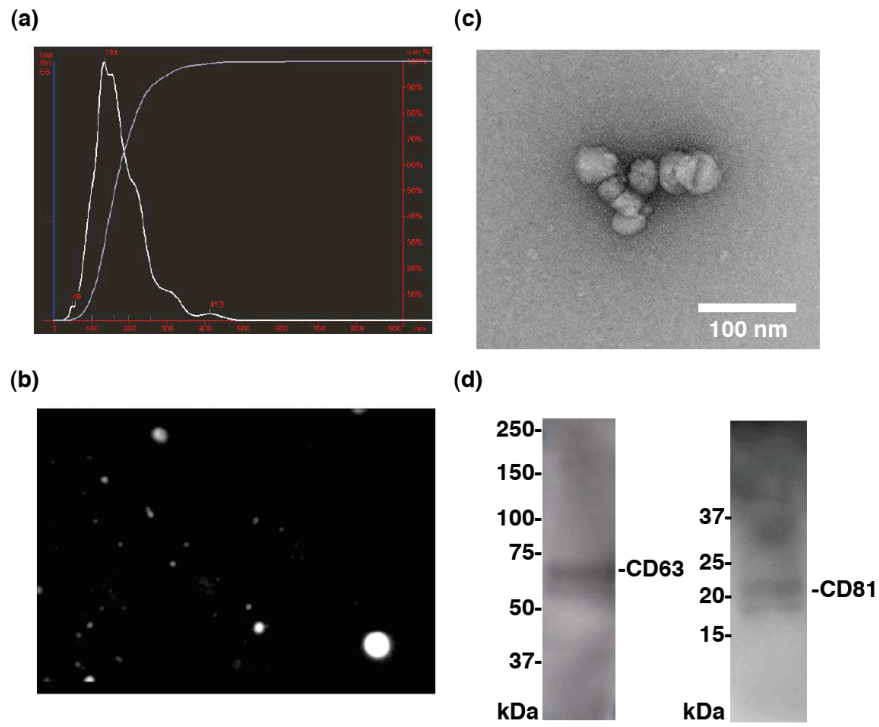

**Supplementary Figure S2.** Characterization of EVs. (a) Particle size distribution of HeLa EVs. (b) NanoSight video frame of HeLa EVs. (c) TEM observation of isolated EVs from HeLa cells. Scale bar: 50 nm. (d) Western blot analyses showing EVs secreted from HeLa cells. The CD63 and CD81 EV (exosome) marker proteins were detected as described in the Methods section.

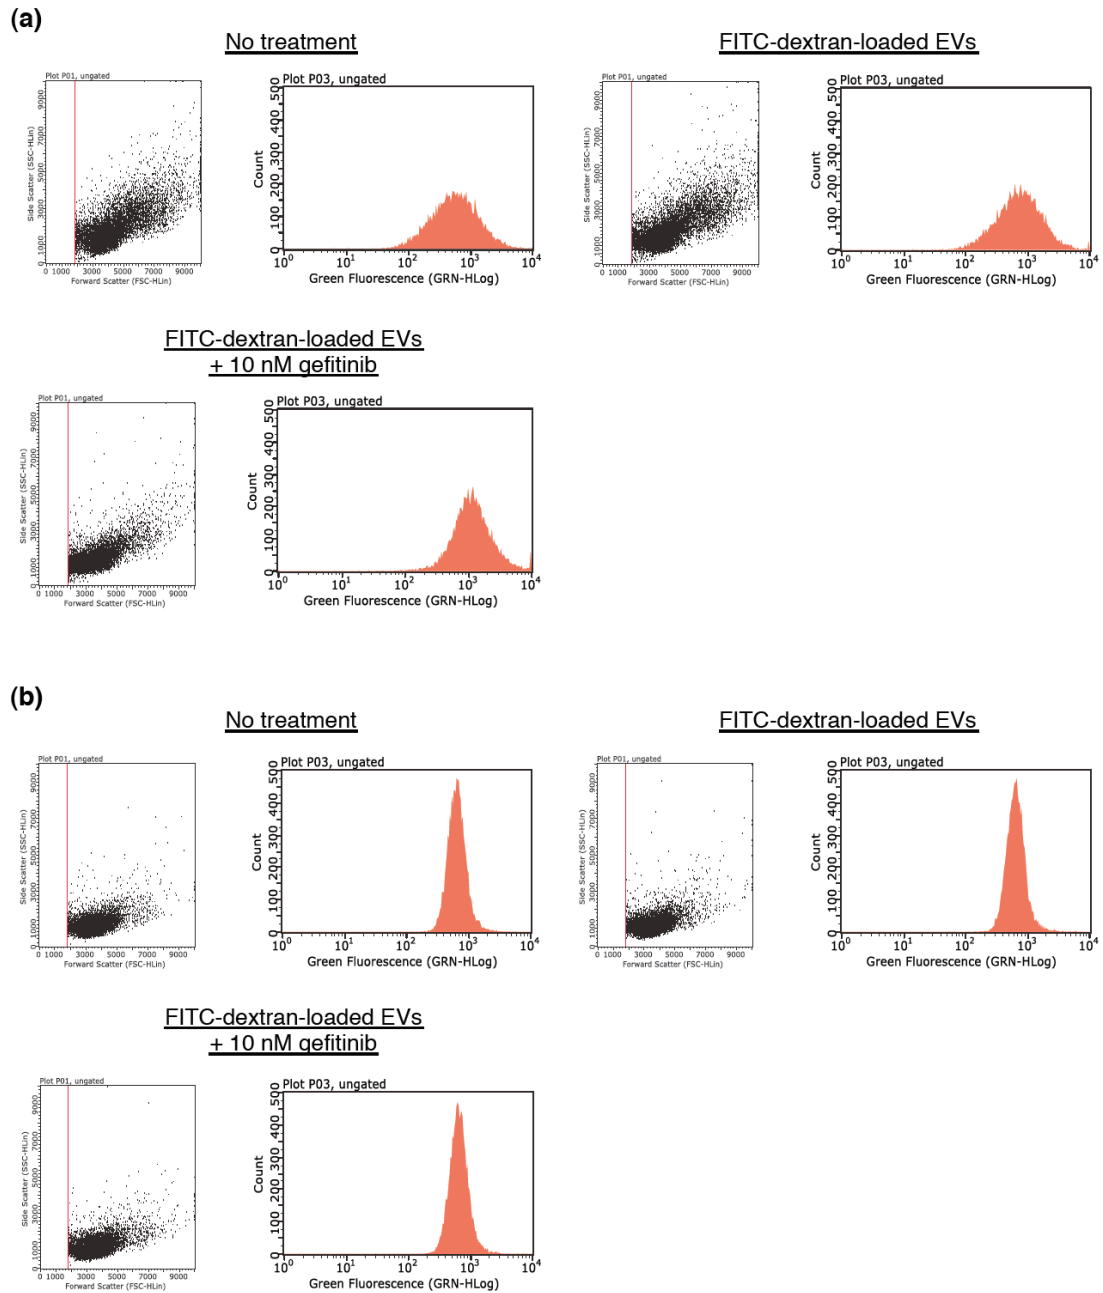

**Supplementary Figure S3.** Effects of gefitinib treatment on cellular uptake of EVs. (a, b) Relative cellular uptake of FITC-dextran-loaded EVs in HCC827 (a) or A549 cells (b) in the presence or absence of gefitinib (10 nM) for 24 h at 37 °C using flow cytometry (each right figure) in the same experimental condition of Figure 2a. Living cells (10,000 cells/sample) were identified based on forward and side scatter analyses (each left figure).

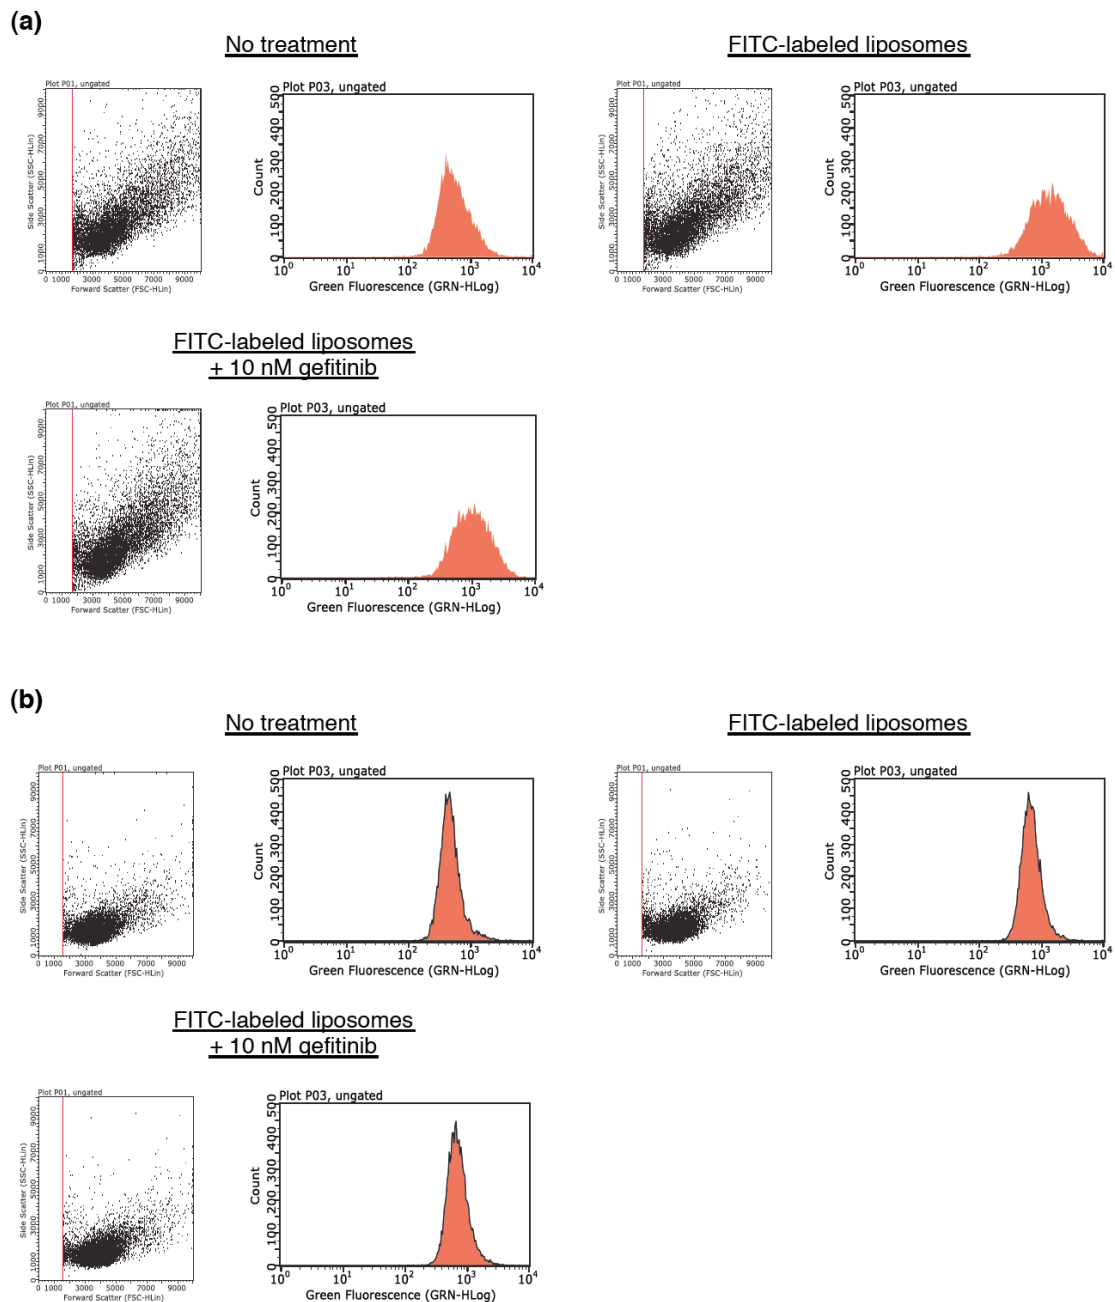

**Supplementary Figure S4.** Effects of gefitinib treatment on cellular uptake of liposomes. (a, b) Relative cellular uptake of FITC-labeled liposomes in HCC827 (a) or A549 cells (b) in the presence or absence of gefitinib (10 nM) for 24 h at 37 °C using flow cytometry (each right figure) in the same experimental condition of Figure 2b. Living cells (10,000 cells/sample) were identified based on forward and side scatter analyses (each left figure).

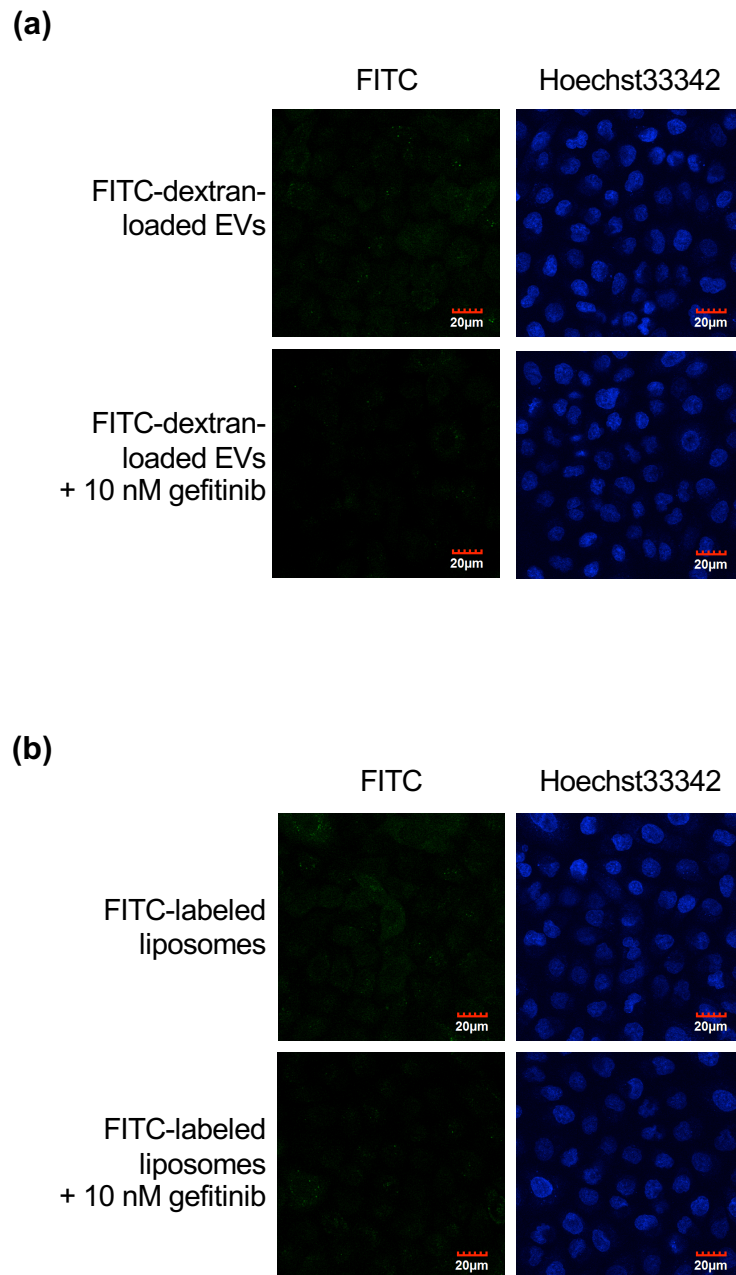

**Supplementary Figure S5.** Confocal microscopic observation of A549 cells treated with EVs and liposomes. (a, b) Confocal microscopic observation of A549 cells treated with FITC-dextran-loaded EVs (a) and FITC-labeled liposomes (b) in the presence or absence of gefitinib (10 nM) for 24 h at 37 °C.

**Supplementary Table S1.** IC<sub>50</sub> (μM) of DOX-loaded EVs and liposomes.

| Cell line           | HCC827 |       | A549 |       |
|---------------------|--------|-------|------|-------|
|                     | 0 nM   | 10 nM | 0 nM | 10 nM |
| DOX-loaded EVs      | 0.42   | 0.08  | 0.32 | 0.24  |
| DOX-loaded liposome | 0.28   | 0.95  | 0.59 | 0.49  |
